# Supplementary material
Source: PubMed Central journal article supplement (PMC1539142)

# Figure S1. kasama & Shigehisa *et al.*

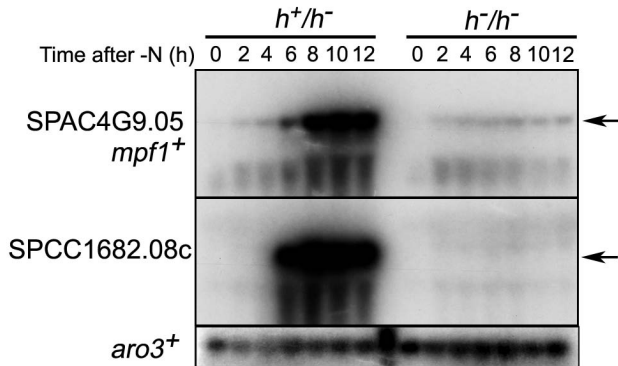

Figure S2. Kasama & Shigehisa *et al.*

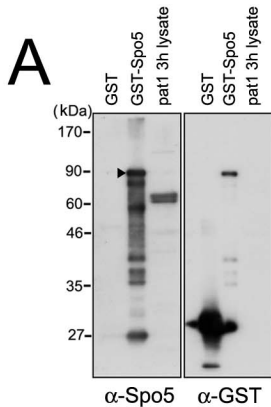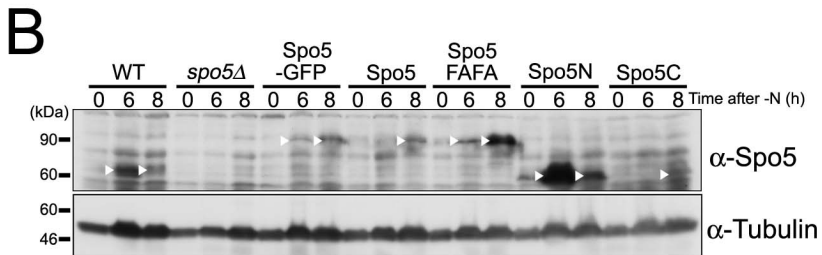

Figure S3. Kasama & Shigehisa *et al.*

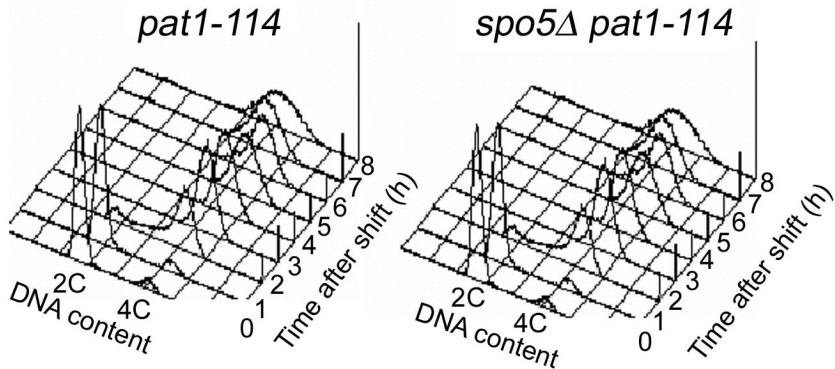

Figure S4. Kasama & Shigehisa *et al.*

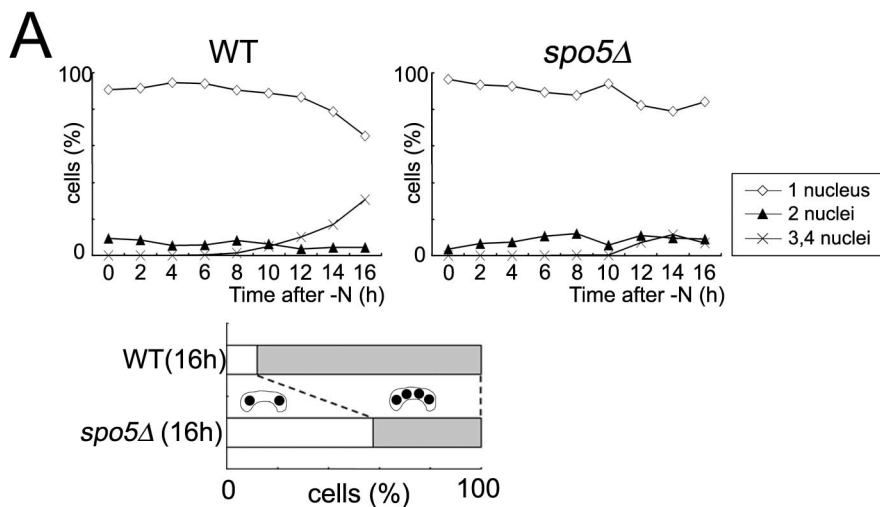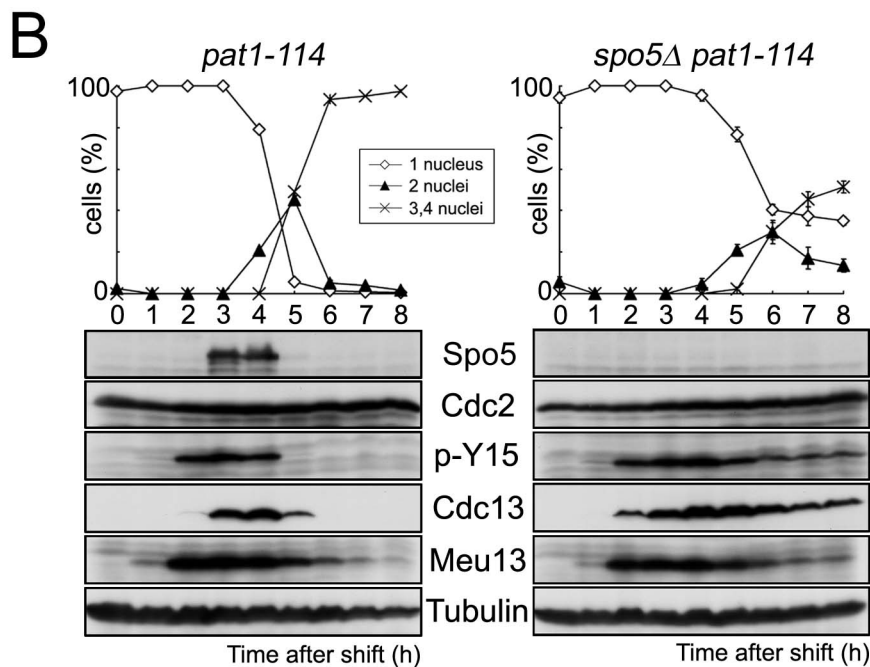

# Figure S5. Kasama & Shigehisa *et al.*

## A

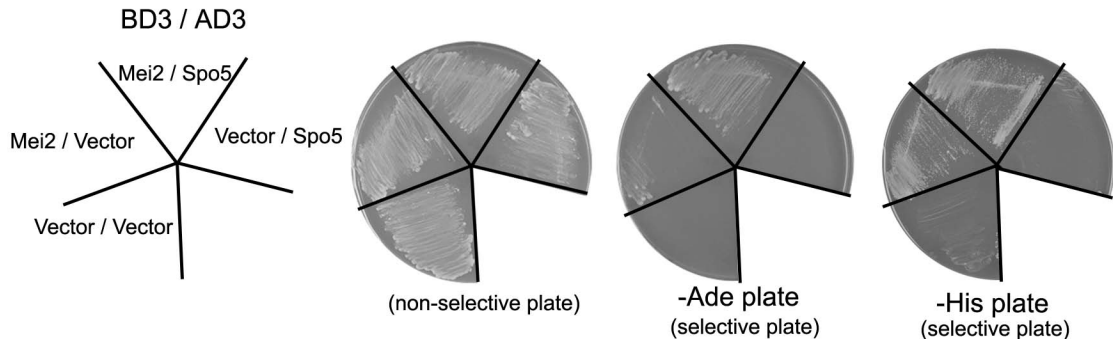

## B

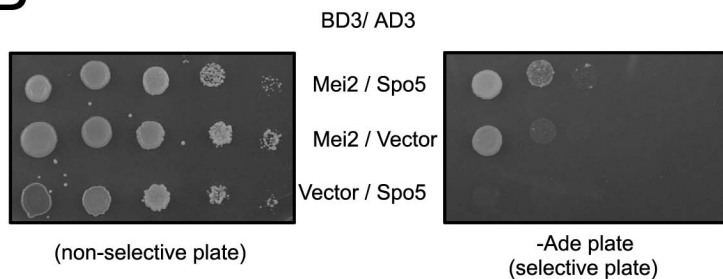

Figure S6. Kasama & Shigehisa *et al.*

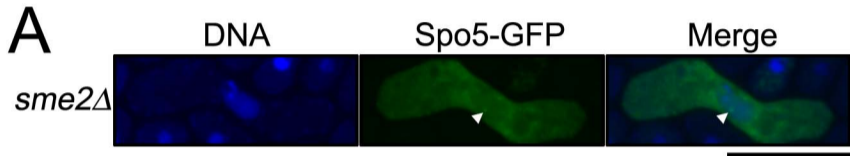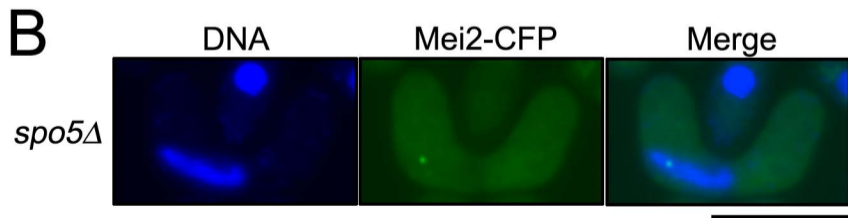

Figure S7. Kasama & Shigehisa *et al.*

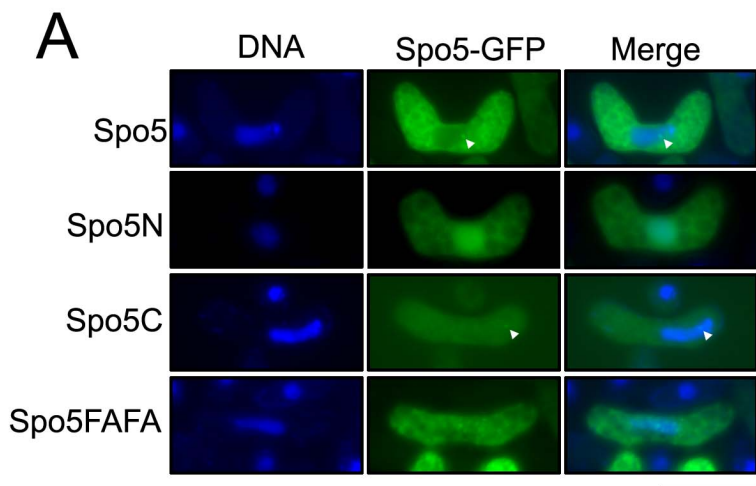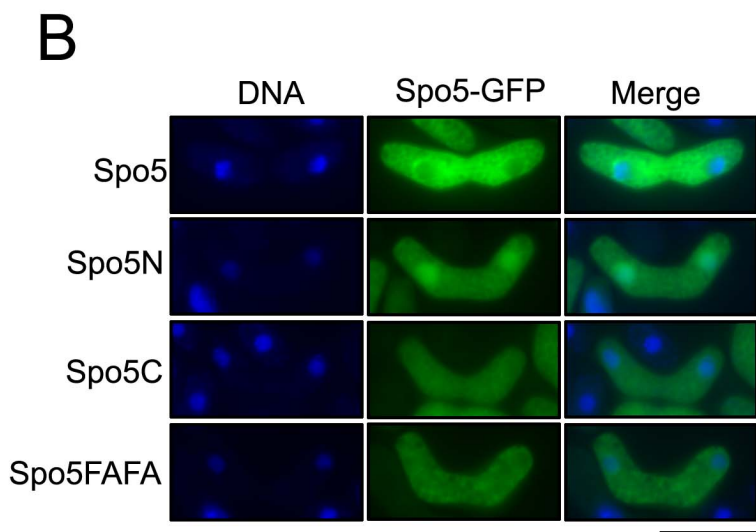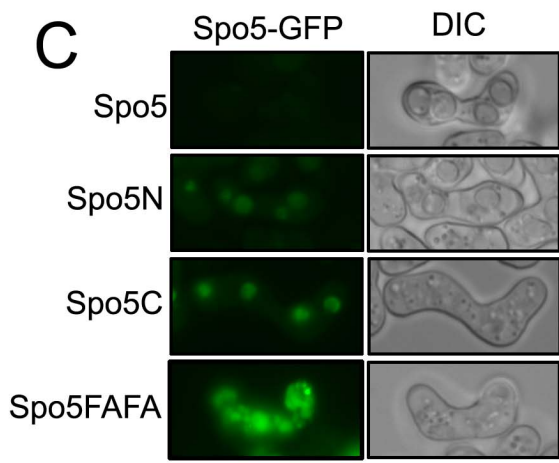

# Figure S8. *kasama* & Shigehisa *et al.*

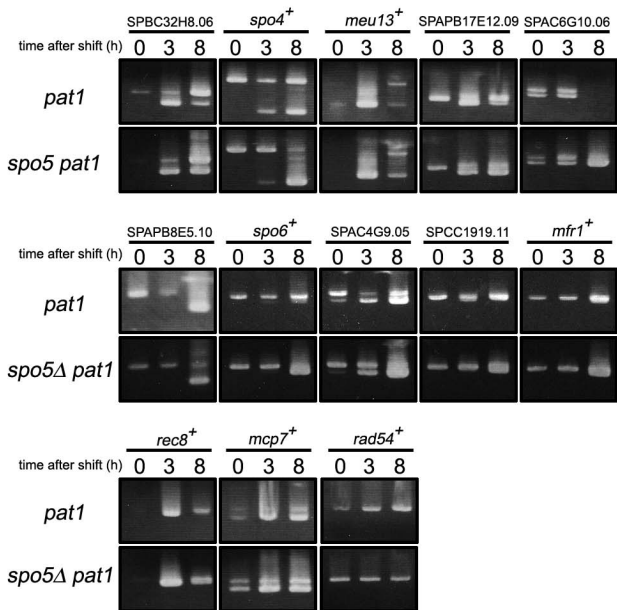

Supplement: eukcell_5_8_1301__1.pdf [file eukcell_5_8_1301__1.pdf]
